# Supplementary material for: In situ grown hierarchical NiO nanosheet@nanowire arrays for high-performance electrochromic energy storage applications
Source: Royal Society of Chemistry journal article supplement (doi:10.1039/d2na00505k), 2022-01-01
Supplement: d2na00505k1.pdf [file d2na00505k1.pdf]

## Supporting Information

### ***In situ* grown hierarchical NiO nanosheet@nanowire arrays for a high-performance electrochromic energy storage application**

Shangzhi Yao<sup>a,b</sup>, Yong Zhang<sup>\*a,b</sup>, Jingyi Cai<sup>a,b</sup>, Yong Hong<sup>c</sup>, Yan Wang<sup>a,b</sup>, Jiewu Cui<sup>a,b</sup>, Xia Shu<sup>a,b</sup>, Jiaqin Liu<sup>a,d</sup>, Hark Hoe Tan<sup>e</sup> and Yucheng Wu<sup>\*a,b</sup>

### **Experimental section**

#### **Materials**

Nickel nitrate ( $\text{Ni}(\text{NO}_3)_2 \cdot 6\text{H}_2\text{O}$ ), urea ( $\text{CH}_4\text{N}_2\text{O}$ ), nickel(II) acetate tetrahydrate ( $\text{Ni}(\text{CH}_3\text{COO})_2 \cdot 4\text{H}_2\text{O}$ ), ethanol ( $\text{C}_2\text{H}_6\text{O}$ ), and KOH were used directly without any further purification.

#### **Pre-seed layer treatment**

FTO coated glass substrates ( $30 \times 50 \text{ mm}^2$  in size) were carefully ultrasonicated in acetone, ethanol and DI water sequentially for 0.5 h to obtain clean surface. Subsequently, the FTO glass substrates were immersed in a 15 mM  $\text{Ni}(\text{CH}_3\text{COO})_2 \cdot 4\text{H}_2\text{O}$  at  $65^\circ\text{C}$  for 0.5 h. Then, the treated glass was transferred to heating plate and annealed at  $275^\circ\text{C}$  for 0.5 h in air.

#### **Synthesis of hierarchical NiO nanosheet@nanowire arrays**

The hierarchical NiO arrays were synthesized by one-step hydrothermal process following heat treatment procedure. First, 290 mg  $\text{Ni}(\text{NO}_3)_2 \cdot 6\text{H}_2\text{O}$  and 600 mg  $\text{CH}_4\text{N}_2\text{O}$  were transferred in 40 mL DI water and 10 mL ethanol and stirred until the solution became clear. The mixed solution was subsequently poured into a 100 mL autoclave, and the post-treated FTO glass substrates were immersed in the solution to

initiate growth of the film. NiO precursor layer was obtained by solution phase reaction at 120°C for 1, 3, 6 and 9 h. When the autoclave was cooled down naturally, the obtained precursor films were carefully cleaned with flowing deionized water and ethanol for 5 minutes, respectively. Subsequently, this precursor was then transformed into NiO by heat treatment at 350°C for 2 h in air with a heating rate of 2 °C/min. The synthesized NiO films are named as NiO-X, where X stands for the different hydrothermal time. A schematic illustrating the experiment procedure is given in Scheme 1.

### **Material Characterization**

The micro size and morphology feature of the synthesized samples were analyzed by using SEM (Hitachi Regulus 8230) and TEM (JEM-2100F). XRD patterns of the samples from 10 to 90 degrees were examined on a X'Pert Pro MPD (PANalytical B.V.) with Cu K $\alpha$  radiation ( $\lambda= 1.54 \text{ \AA}$ ). XPS data was examined with A Thermo ESCALAB250Xi system using Al K $\alpha$  radiation.

### **Electrochemical tests**

Electrochemical tests were performed with a three-electrode system. 1 M KOH aqueous solution was used as the reaction electrolyte. The synthesized NiO sample, an Ag/AgCl electrode and a clean Pt wire electrode were used as the working, reference and counter electrode, respectively. Chronoamperometry (CA), cyclic voltammetry (CV), i-t curve and galvanostatic charge–discharge (GCD) measurements were tested accompanying corresponding *in situ* spectroscopic test at 550 nm by an electrochemical workstation (CHI760E) and a Shimadzu UV-3600 UV-VIS-NIR spectrophotometer. Detailly, the CV measurements were tested in the applied voltage

range of -1.0~1.0 V with scan rate of 0.005 V/s. The optical transmittance of the film was tested over the wavelength range from 300 to 1300 nm. The dynamic optical modulation was obtained at 550 nm by applying voltage between -1.0 V and 1.0 V with a duration of 20 s for each step. Electrochemical impedance spectroscopy (EIS) was tested with AC amplitude of 0.005 V with a frequency range of 0.1~100 kHz. The calculated mass loading of the NiO-3h electrode is 0.037 mg cm<sup>-2</sup>.

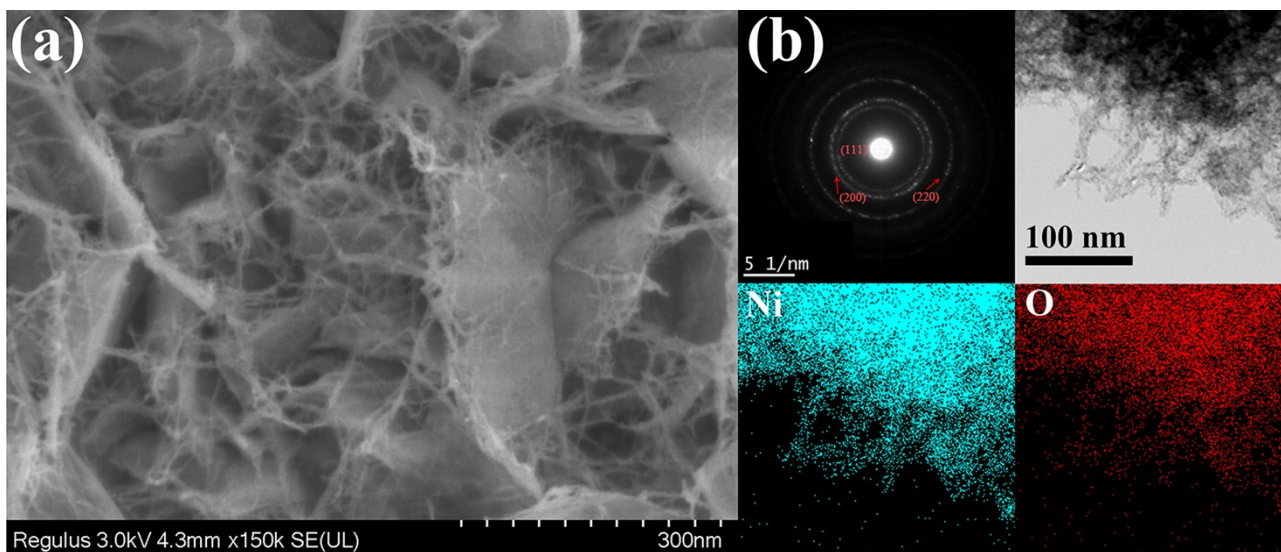

Figure S1. (a) High magnification FESEM image and (b) corresponding SAED patterns and EDS maps of NiO-3h.

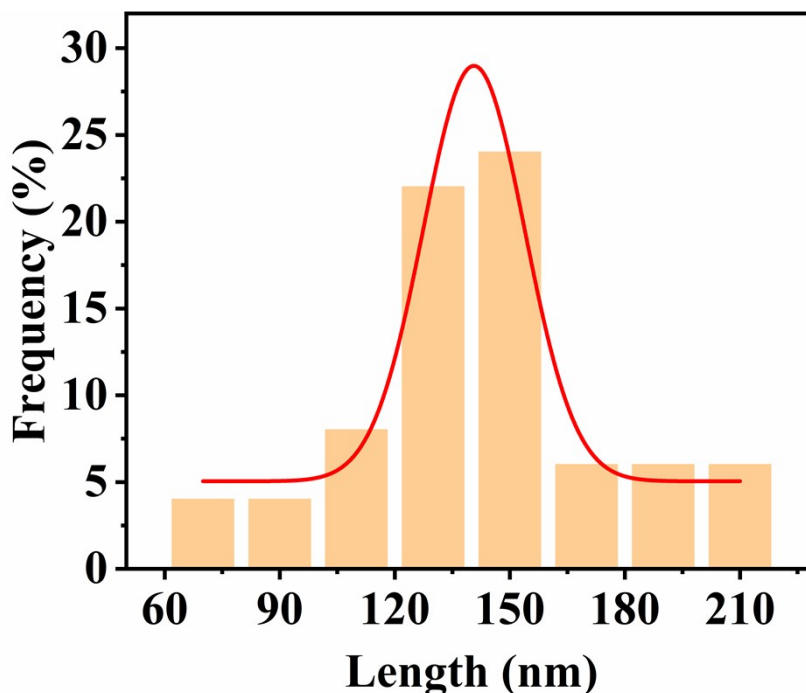

Figure S2. Statistical analysis of the length of NiO-3h.

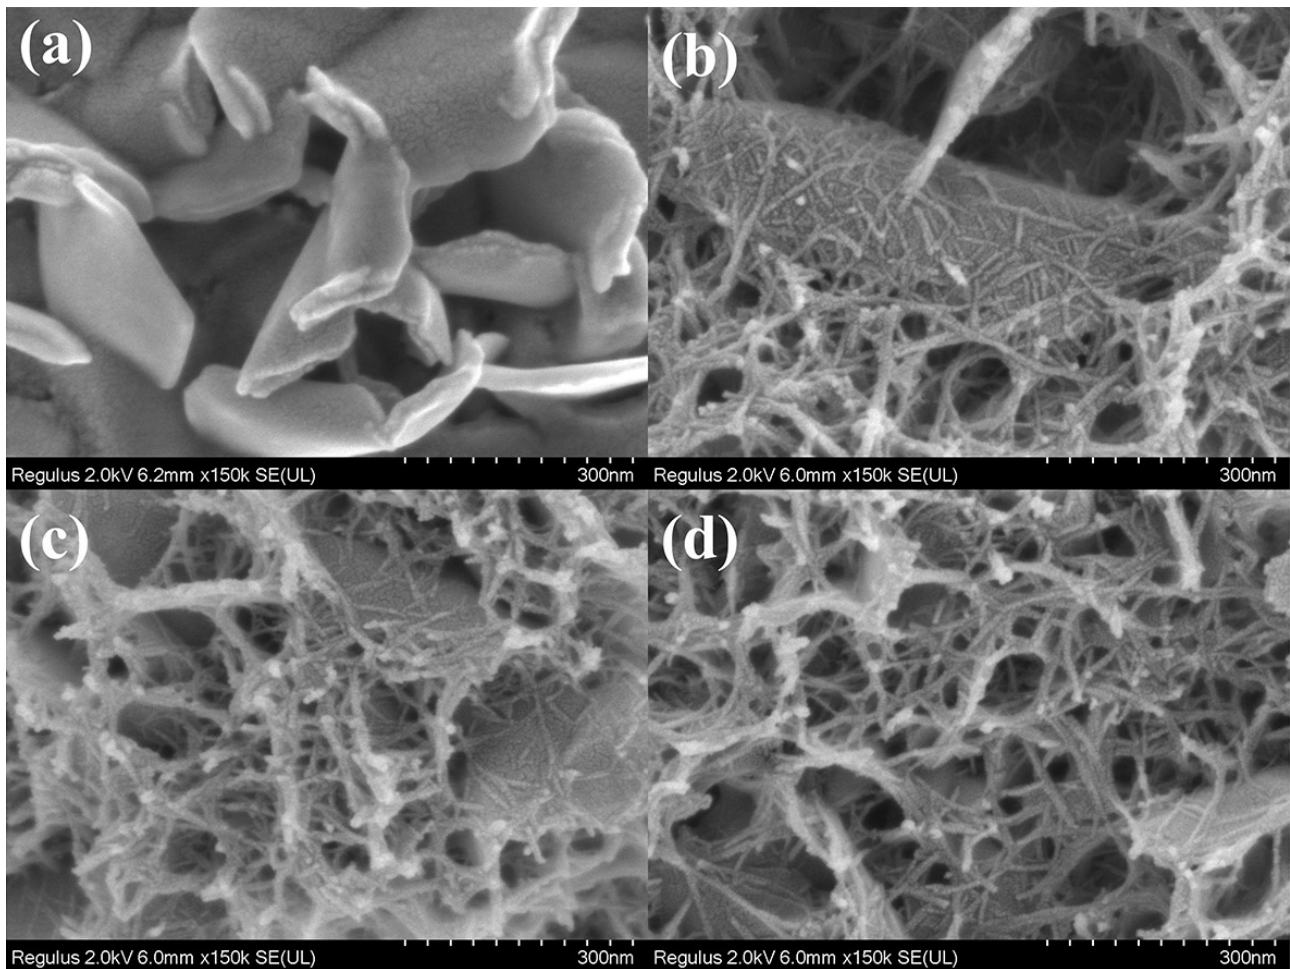

Figure S3. FESEM image of the precursors of (a) NiO-1h, (b) NiO-3h, (c) NiO-6h and (d) NiO-9h.

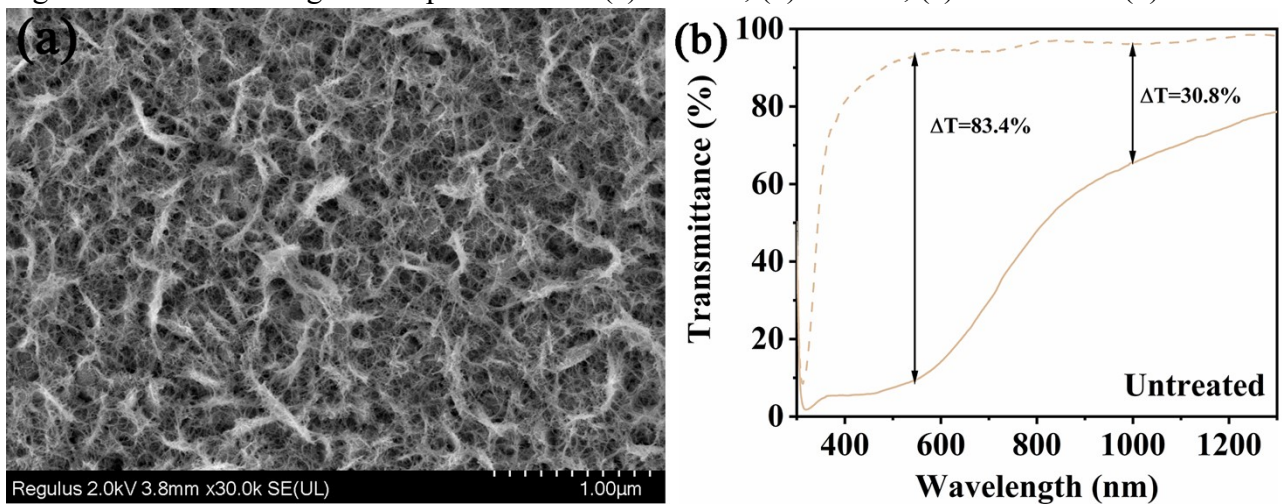

Figure S4. (a) FESEM image and (b) transmittance spectra of NiO-3h synthesized under the same conditions but without the seed layer treatment of the FTO substrate.

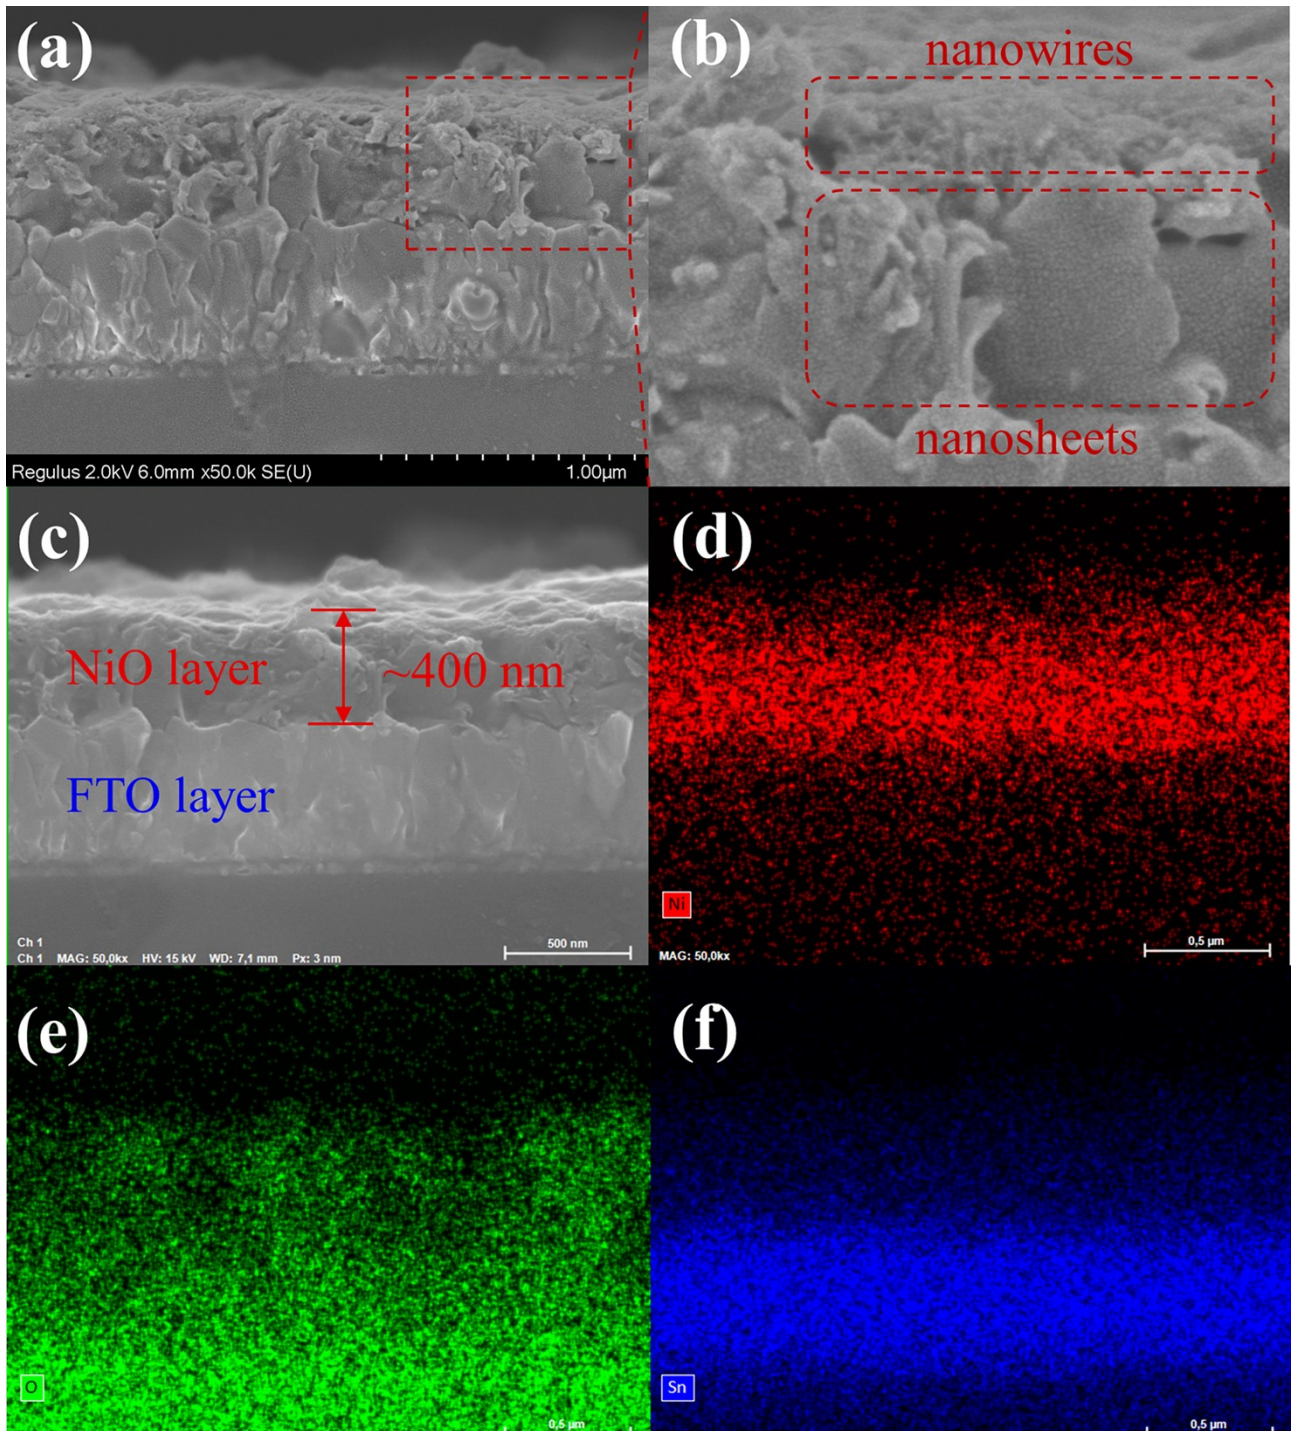

Figure S5. The FESEM picture of cross-sectional view and corresponding EDS maps of NiO-9h.

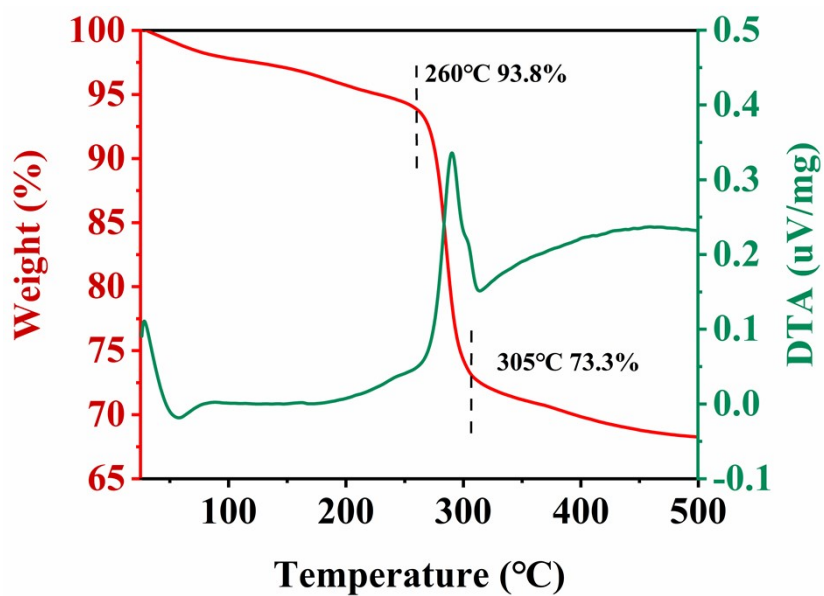

Figure S6. TGA and DTA curves of the NiO precursor.

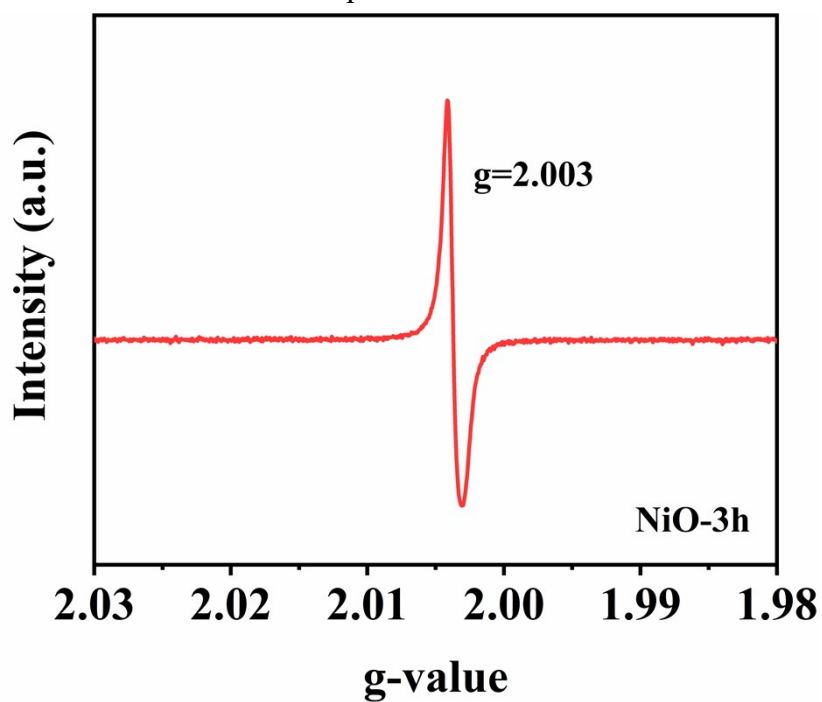

Figure S7. EPR spectrum of the NiO-3h film.

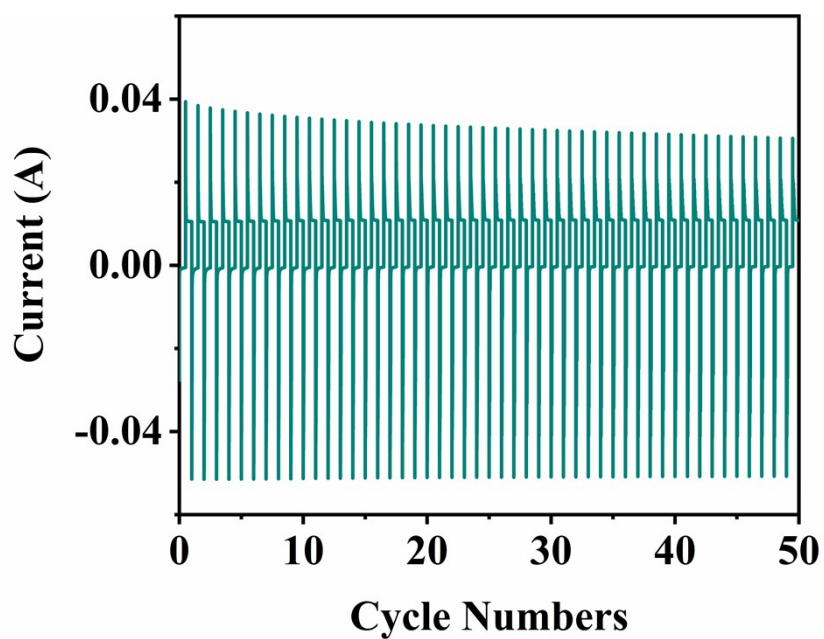

Figure S8. Current profile of the NiO-3h with a square wave potential oscillating between +1.0 and -1.0 V in an activation process.

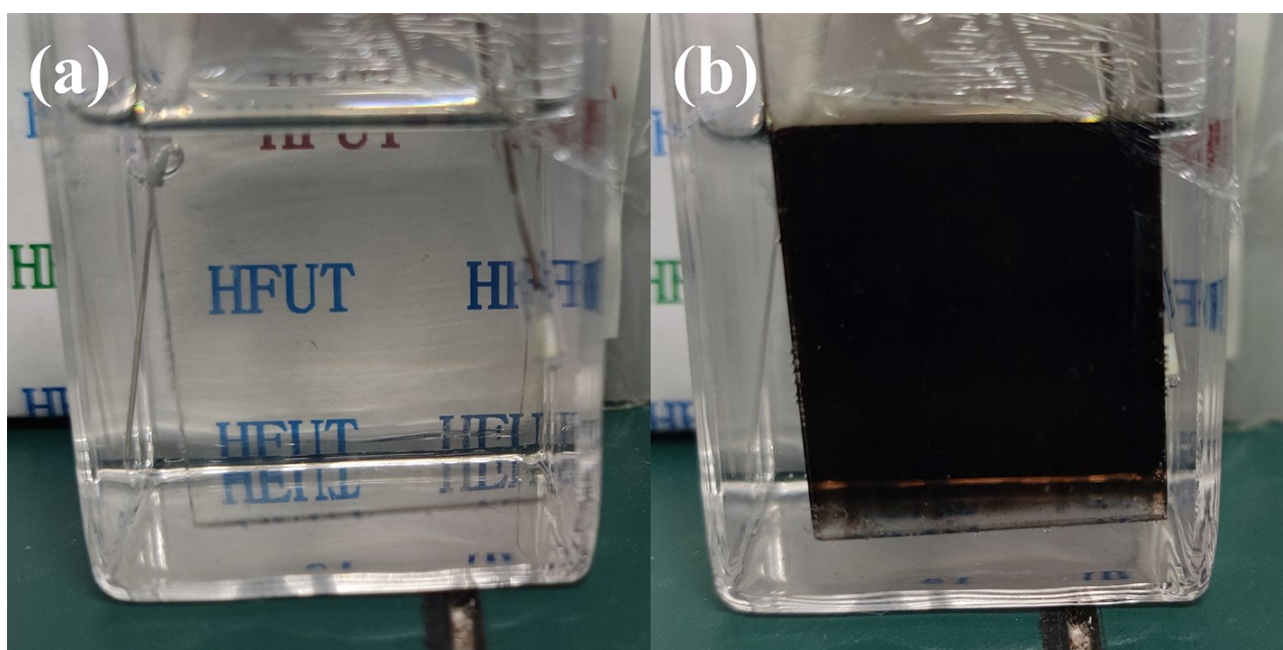

Figure S9. Optical photographs of NiO-3h at (a) bleached state and (b) colored state.

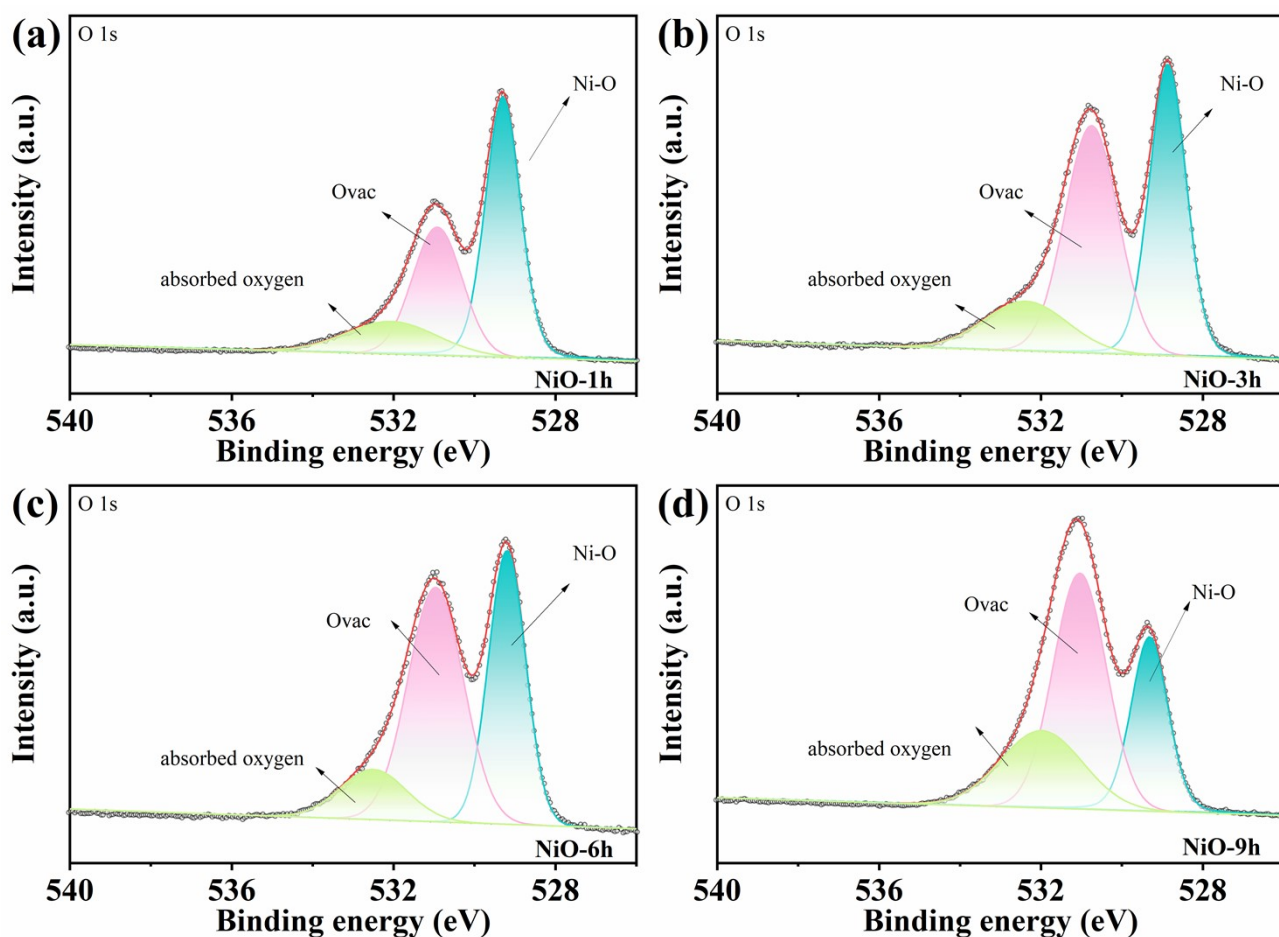

Figure S10. XPS O 1s spectrum of (a) NiO-1h, (b) NiO-3h, (c) NiO-6h and (d) NiO-9h.

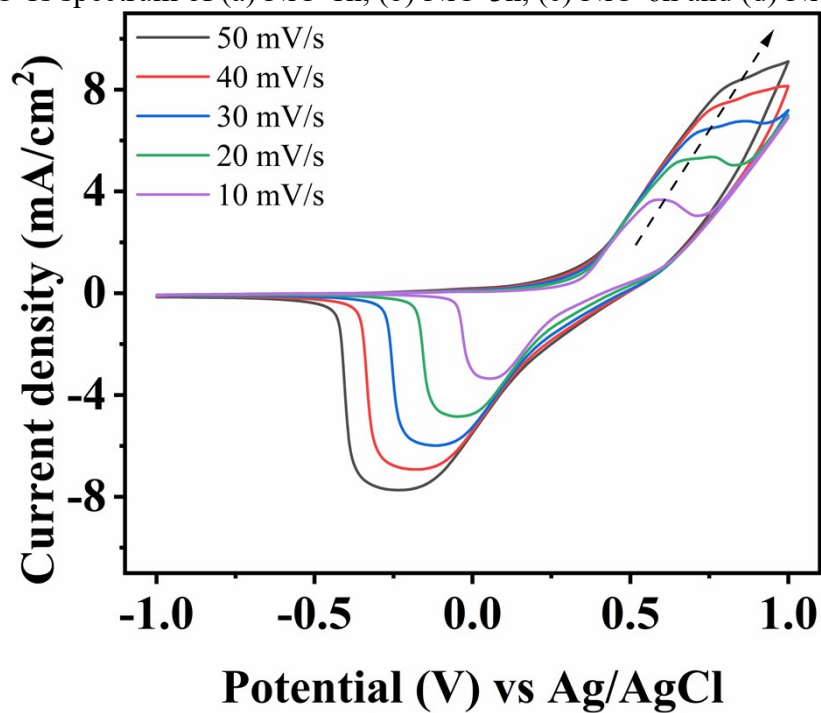

Figure S11. CV curves of NiO-3h at various scan rates.



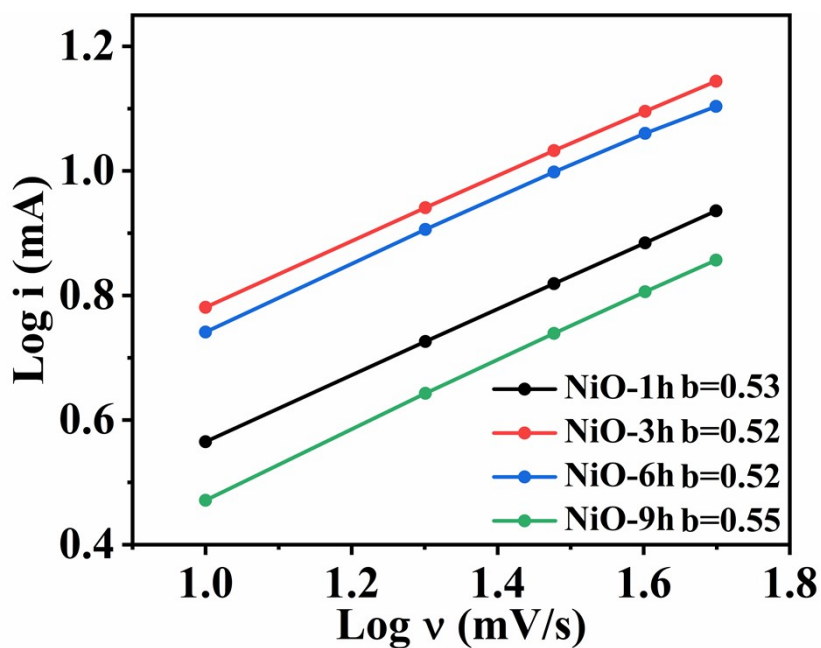

Figure S12. The power law relationship between the peak currents and scan rates of the NiO-3h thin films.

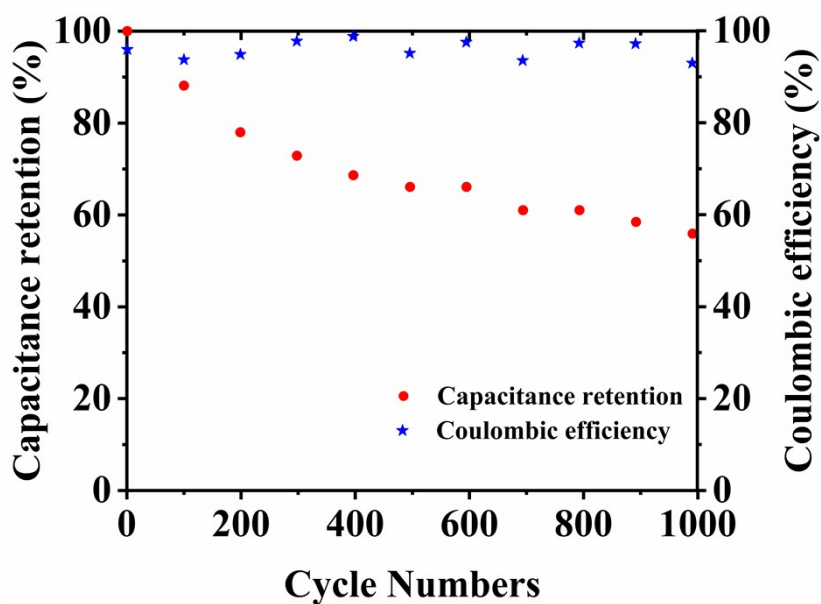

Figure S13. Capacitance retention and coulombic efficiency of the NiO-3h electrode over 1000 cycles at a current density of  $0.42 \text{ mA/cm}^2$ .

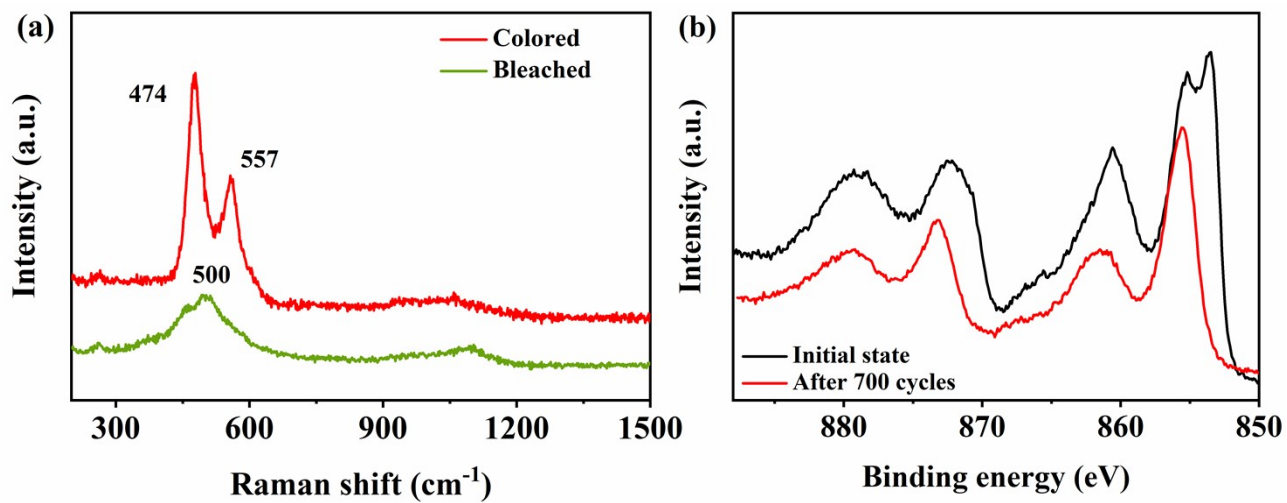

Figure S14 (a) Raman spectra of the coloring and bleaching states of NiO-3h film after 700 cycles. (b) Ni 2p of NiO-3h at different cycling times.

| Film   | Coloring Time (s) | Bleaching Time (s) |
|--------|-------------------|--------------------|
| NiO-1h | 6                 | 2.2                |
| NiO-3h | 9.8               | 5.4                |
| NiO-6h | 5.6               | 3.2                |
| NiO-9h | 5.8               | 3.2                |

Table S1. Switching time of the NiO samples.

| Sample                    | $\Delta T$       | CE ( $\text{cm}^2\text{C}^{-1}$ ) | Cycle stability          | Capacitive performance                                        | References |
|---------------------------|------------------|-----------------------------------|--------------------------|---------------------------------------------------------------|------------|
| NiO                       | 63.6% at 550 nm  | 42.8                              | 90.8% after 3000C        | 308 F/g at 2 A/g                                              | 7          |
| Al-doped NiO              | 58.4% at 500 nm  | 54.2                              | 30% decrease after 2000C | NA                                                            | 11         |
| NiO-Co5                   | 52% at 550 nm    | NA                                | NA                       | 88.24 $\text{mF}/\text{cm}^2$ at 0.4 $\text{mA}/\text{cm}^2$  | 40         |
| NiO                       | 51% at 550 nm    | 40                                | <10% after 3000C         | NA                                                            | 41         |
| N-doped carbon coated NiO | 54.27% at 450 nm | 48.5                              | NA                       | 235.8 F/g at 2 A/g                                            | 42         |
| Li-doped NiO              | 66.8% at 550 nm  | 31.2                              | NA                       | 13 $\text{mF}/\text{cm}^2$ at 0.1 $\text{mA}/\text{cm}^2$     | 43         |
| NiO nano-sheets           | 66.9% at 550 nm  | 48.51                             | NA                       | 129.32 $\text{mF}/\text{cm}^2$ at 5 $\text{mV}/\text{s}$      | 44         |
| NiO MS-HMS                | 47% at 600 nm    | 85.3                              | NA                       | NA                                                            | 45         |
| Hierarchical NiO film     | 95% at 550 nm    | 91.2                              | 86.5% after 700C         | 117.2 $\text{mF}/\text{cm}^2$ at 0.14 $\text{mA}/\text{cm}^2$ | This work  |

Table S2. A summary of electrochromic energy storage performance based on different nickel oxide materials.
